# Supplementary material for: Long Term Real-World Outcomes of Trifluridine/Tipiracil in Metastatic Colorectal Cancer—A Single UK Centre Experience
Source: Curr Oncol. 2021 Jun 18;28(3):2260–9. doi: 10.3390/curroncol28030208 (PMC8293218; doi:10.3390/curroncol28030208)
Supplement: Supplementary file 1 [file curroncol-28-00208-s001.zip › curroncol-1180417-supplementary.pdf]

## Supplementary Materials

**Table S1.** Details of Lonsurf treatment.

| Variable                                                               | Value |             |
|------------------------------------------------------------------------|-------|-------------|
|                                                                        | (n)   | (%)         |
| Median age commencing Lonsurf                                          | 66    | Range 34–82 |
| Performance status prior to cycle 1                                    |       |             |
| 0                                                                      | 7     | 12.5        |
| 1                                                                      | 35    | 62.5        |
| 2                                                                      | 11    | 19.6        |
| 3                                                                      | 1     | 1.8         |
| 4                                                                      | 0     | 0           |
| Not stated                                                             | 2     | 3.6         |
| Median interval between last cycle of chemo & cycle 1 Lonsurf (months) | 1     | Range 0–23  |
| Median number of cycles administered                                   | 3     | Range 1–16  |
| Interval between treatment discontinuation and death                   | 2     | Range 1–13  |
| Reason for discontinuation                                             |       |             |
| PD                                                                     | 19    | 33.9        |
| Worsening PS                                                           | 2     | 3.6         |
| General decline                                                        | 16    | 28.6        |
| Toxicity                                                               | 1     | 1.8         |
| Death                                                                  | 4     | 7.1         |
| Patient preference                                                     | 1     | 1.8         |
| Not stated                                                             | 13    | 23.2        |
